# Supplementary material
Source: PubMed Central journal article supplement (PMC10224771)
Supplement: NIHMS1863779-supplement-Supplemental_Digital_Content.pdf [file NIHMS1863779-supplement-Supplemental_Digital_Content.pdf]

Figure S1

## Schematic of Tatelo Phase A and B Design

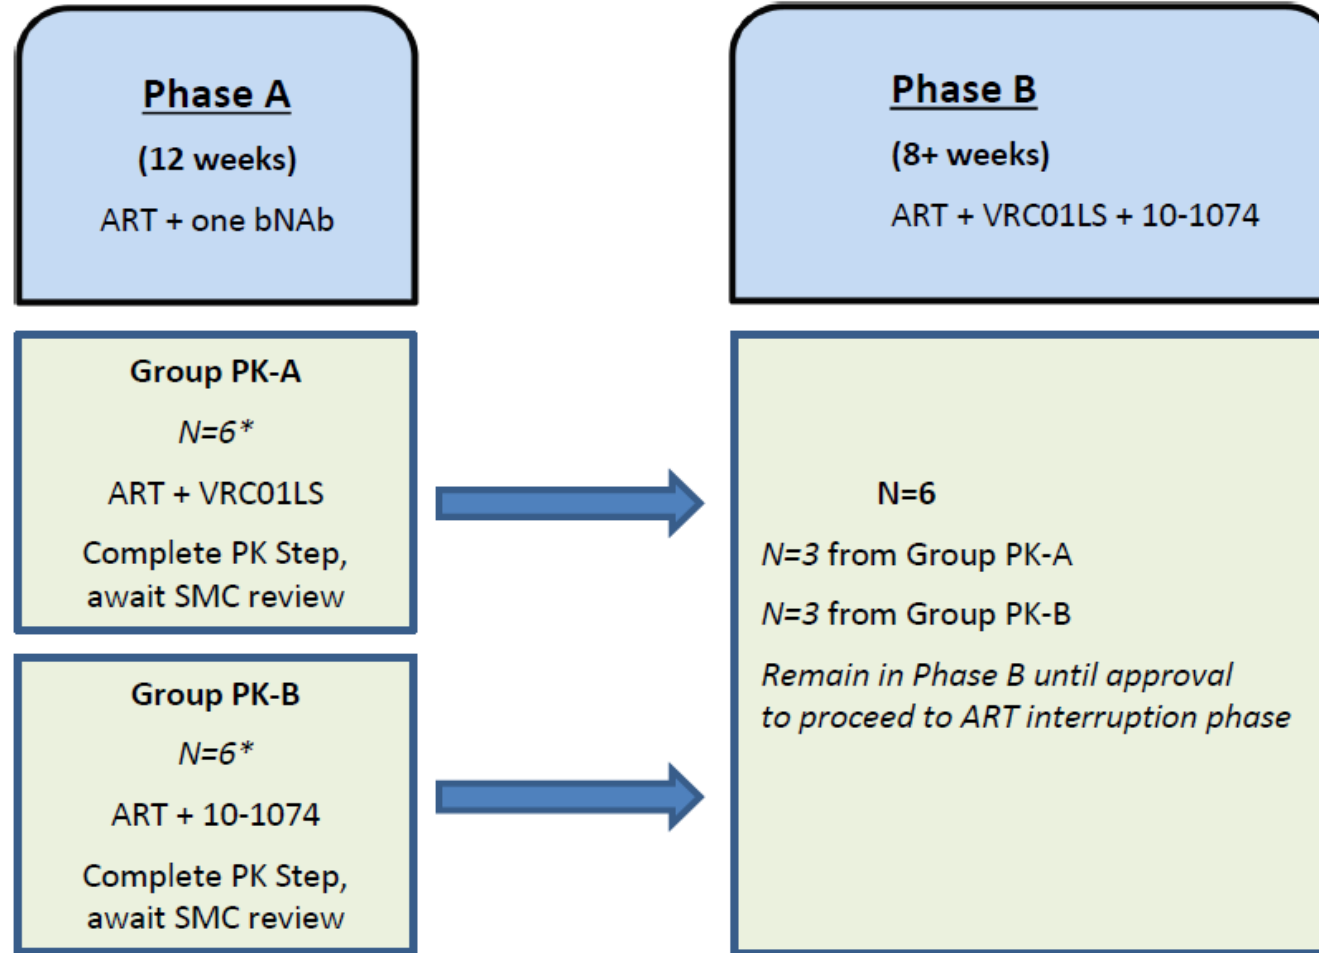

bNAb, broadly neutralizing monoclonal antibodies; SMC, Safety Monitoring Committee, ART, antiretroviral treatment

\*Enrollments alternate between Groups

Figure S2

## Overall goodness of fit of the final PK models

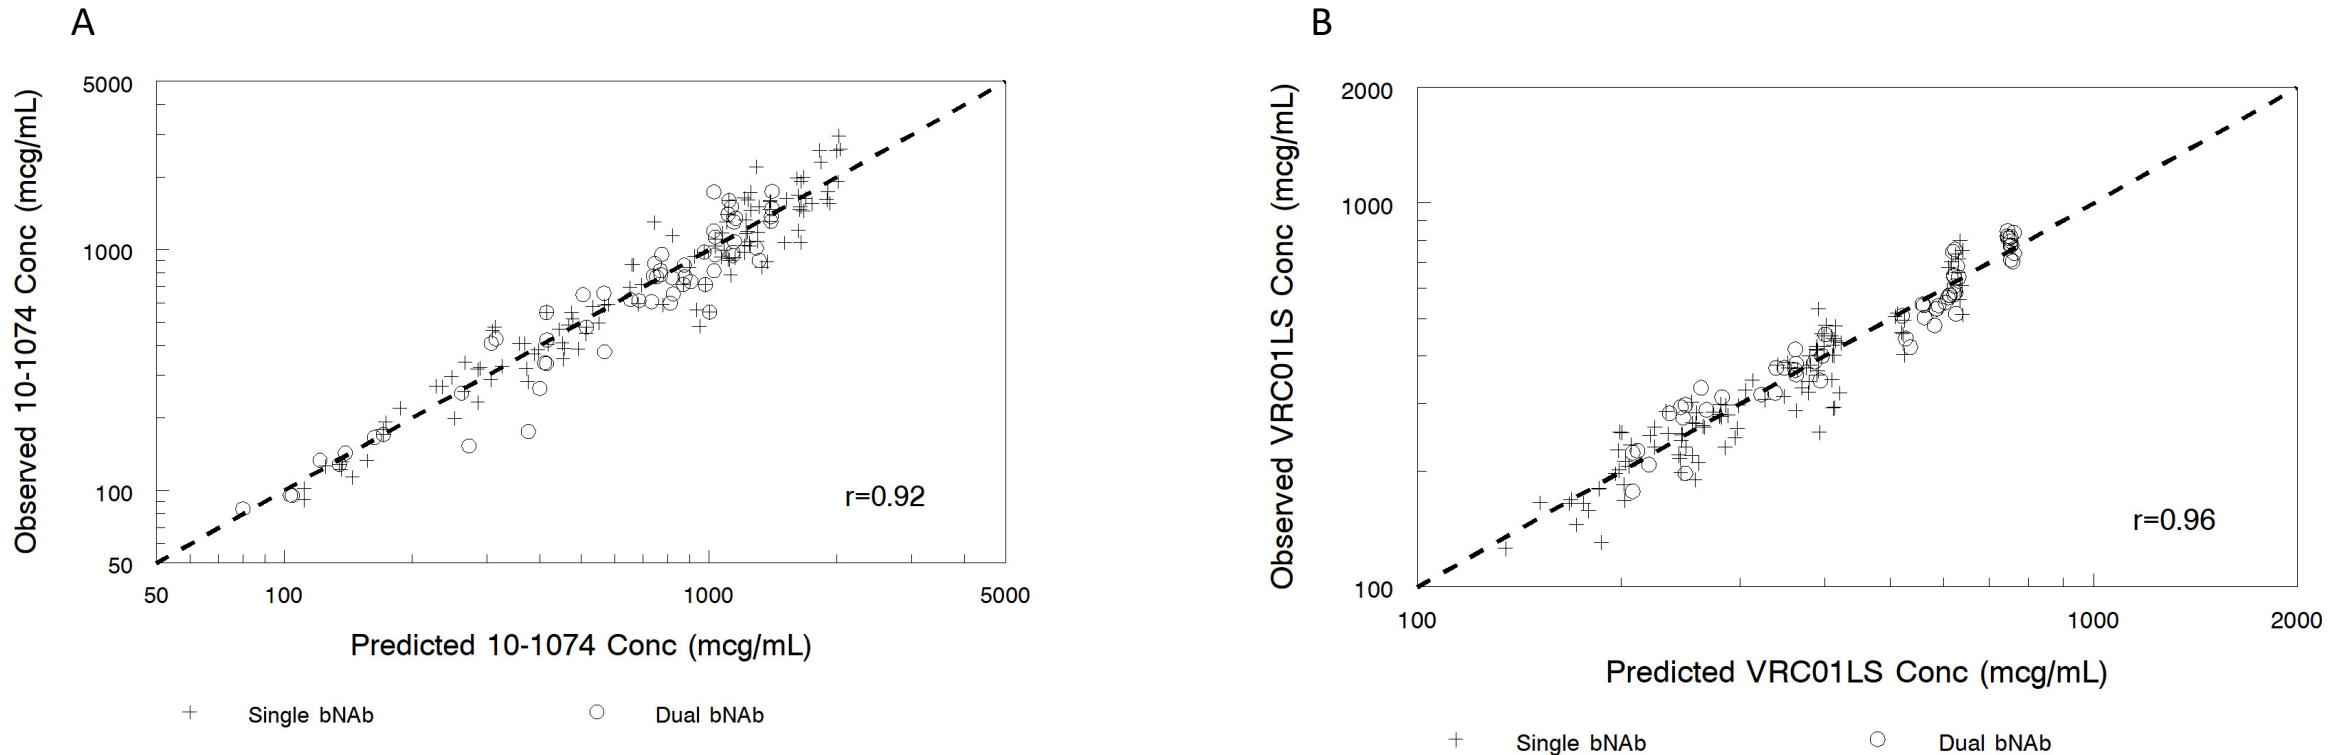

Observed versus individual predicted concentrations for 10-1074 with the line of unity shown by the dashed line. ( $r=0.92$ ) (Supplemental Figure S2A) Observed versus individual predicted concentrations for VRC01LS with the line of unity shown by the dashed line. ( $r=0.96$ ) (Supplemental Figure S2B). Concentrations following single bNAbs administration are represented by the symbol “+” while concentrations following dual bNAbs administration are shown as “o”.
